# Supplementary material
Source: publisher site journal article supplement (https://www.dovepress.com/article/406627)
Supplement: Supplementary file 1 [file get_supplementary_file.php]

***Supplementary material***

**ROS generative black phosphorus-tamoxifen nanosheets for targeted endocrine-sonodynamic synergistic breast cancer therapy**

Jing Wang1,#, Weijian Chen 1,2,#, Wenxiang Du 2, Hongjie Zhang2 , Matthias Ilmer3，Lei Song 2 ,Yuan Hu2,* , Xiaopeng Ma 1,*

1 Department of General Surgery, The First Affiliated Hospital of USTC, Division of Life Sciences and Medicine, University of Science and Technology of China, Hefei, Anhui, 230001, P.R. China.

2 State Key Laboratory of Fire Science, University of Science and Technology of China, Hefei 230026, Anhui, P.R. China.

3 Department of General, Visceral, and Transplantation Surgery, Ludwig-Maximilians-University (LMU), Campus Grosshadern, 81377 Munich, Germany

# These authors contributed equally to this study.

*Corresponding Authors:

Yuan Hu, Email: yuanhu@ustc.edu.cn

Xiaopeng Ma, Email: [XiaopengMa@fsyy.ustc.edu.cn](mailto:XiaopengMa@fsyy.ustc.edu.cn)

**Table. S1** The primer sequence for qPCR

| **c-myc** |  |
| --- | --- |
| Forward Sequence | CCTGGTGCTCCATGAGGAGAC |
| Reverse Sequence | CAGACTCTGACCTTTTGCCAGG |
| **cyclinD1** |  |
| Forward Sequence | TCTACACCGACAACTCCATCCG |
| Reverse Sequence | TCTGGCATTTTGGAGAGGAAGTG |
| **ESR** |  |
| Forward Sequence | GCTTACTGACCAACCTGGCAGA |
| Reverse Sequence | GGATCTCTAGCCAGGCACATTC |
| **GAPDH** |  |
| Forward Sequence | GTCTCCTCTGACTTCAACAGCG |
| Reverse Sequence | ACCACCCTGTTGCTGTAGCCAA |

**T****able. S2** TAM drug loading capacity with various TAM/BP mass ratio

| Primary TAM/BP ratio | Free TAM (mg) | Loading TAM  (mg) | Loading TAM/BP mass ratio (%) | Loading efficiency (%) |
| --- | --- | --- | --- | --- |
| 0.25 : 1 | 0.423 | 0.327 | 10.91 | 43.60 |
| 0.5 : 1 | 0.899 | 0.601 | 20.03 | 40.07 |
| 1 : 1 | 2.018 | 0.982 | 32.72 | 32.73 |
| 2 : 1 | 4.040 | 1.960 | 65.34 | 32.67 |
| 4 : 1 | 8.834 | 3.166 | 105.52 | 26.38 |

**Table. S3** Top 10 pathways enrichment of KEGG. Count: number of genes enriched in the corresponding pathway

| ID | Description | qvalue | Count |
| --- | --- | --- | --- |
| hsa04110 | Cell cycle | 3.60E-11 | 26 |
| hsa03440 | Homologous recombination | 1.37E-06 | 12 |
| hsa03460 | Fanconi anemia pathway | 2.61E-05 | 12 |
| hsa04115 | p53 signaling pathway | 0.00057063 | 12 |
| hsa04218 | Cellular senescence | 0.001984592 | 17 |
| hsa05210 | Colorectal cancer | 0.008817501 | 11 |
| hsa01524 | Platinum drug resistance | 0.008817501 | 10 |
| hsa00140 | Steroid hormone biosynthesis | 0.008887059 | 9 |
| hsa04210 | Apoptosis | 0.031184406 | 13 |
| hsa03030 | DNA replication | 0.038662338 | 6 |
| hsa00980 | Metabolism of xenobiotics by cytochrome P450 | 0.039924269 | 9 |
| hsa04114 | Oocyte meiosis | 0.045245797 | 12 |
| hsa00030 | Pentose phosphate pathway | 0.073209214 | 5 |


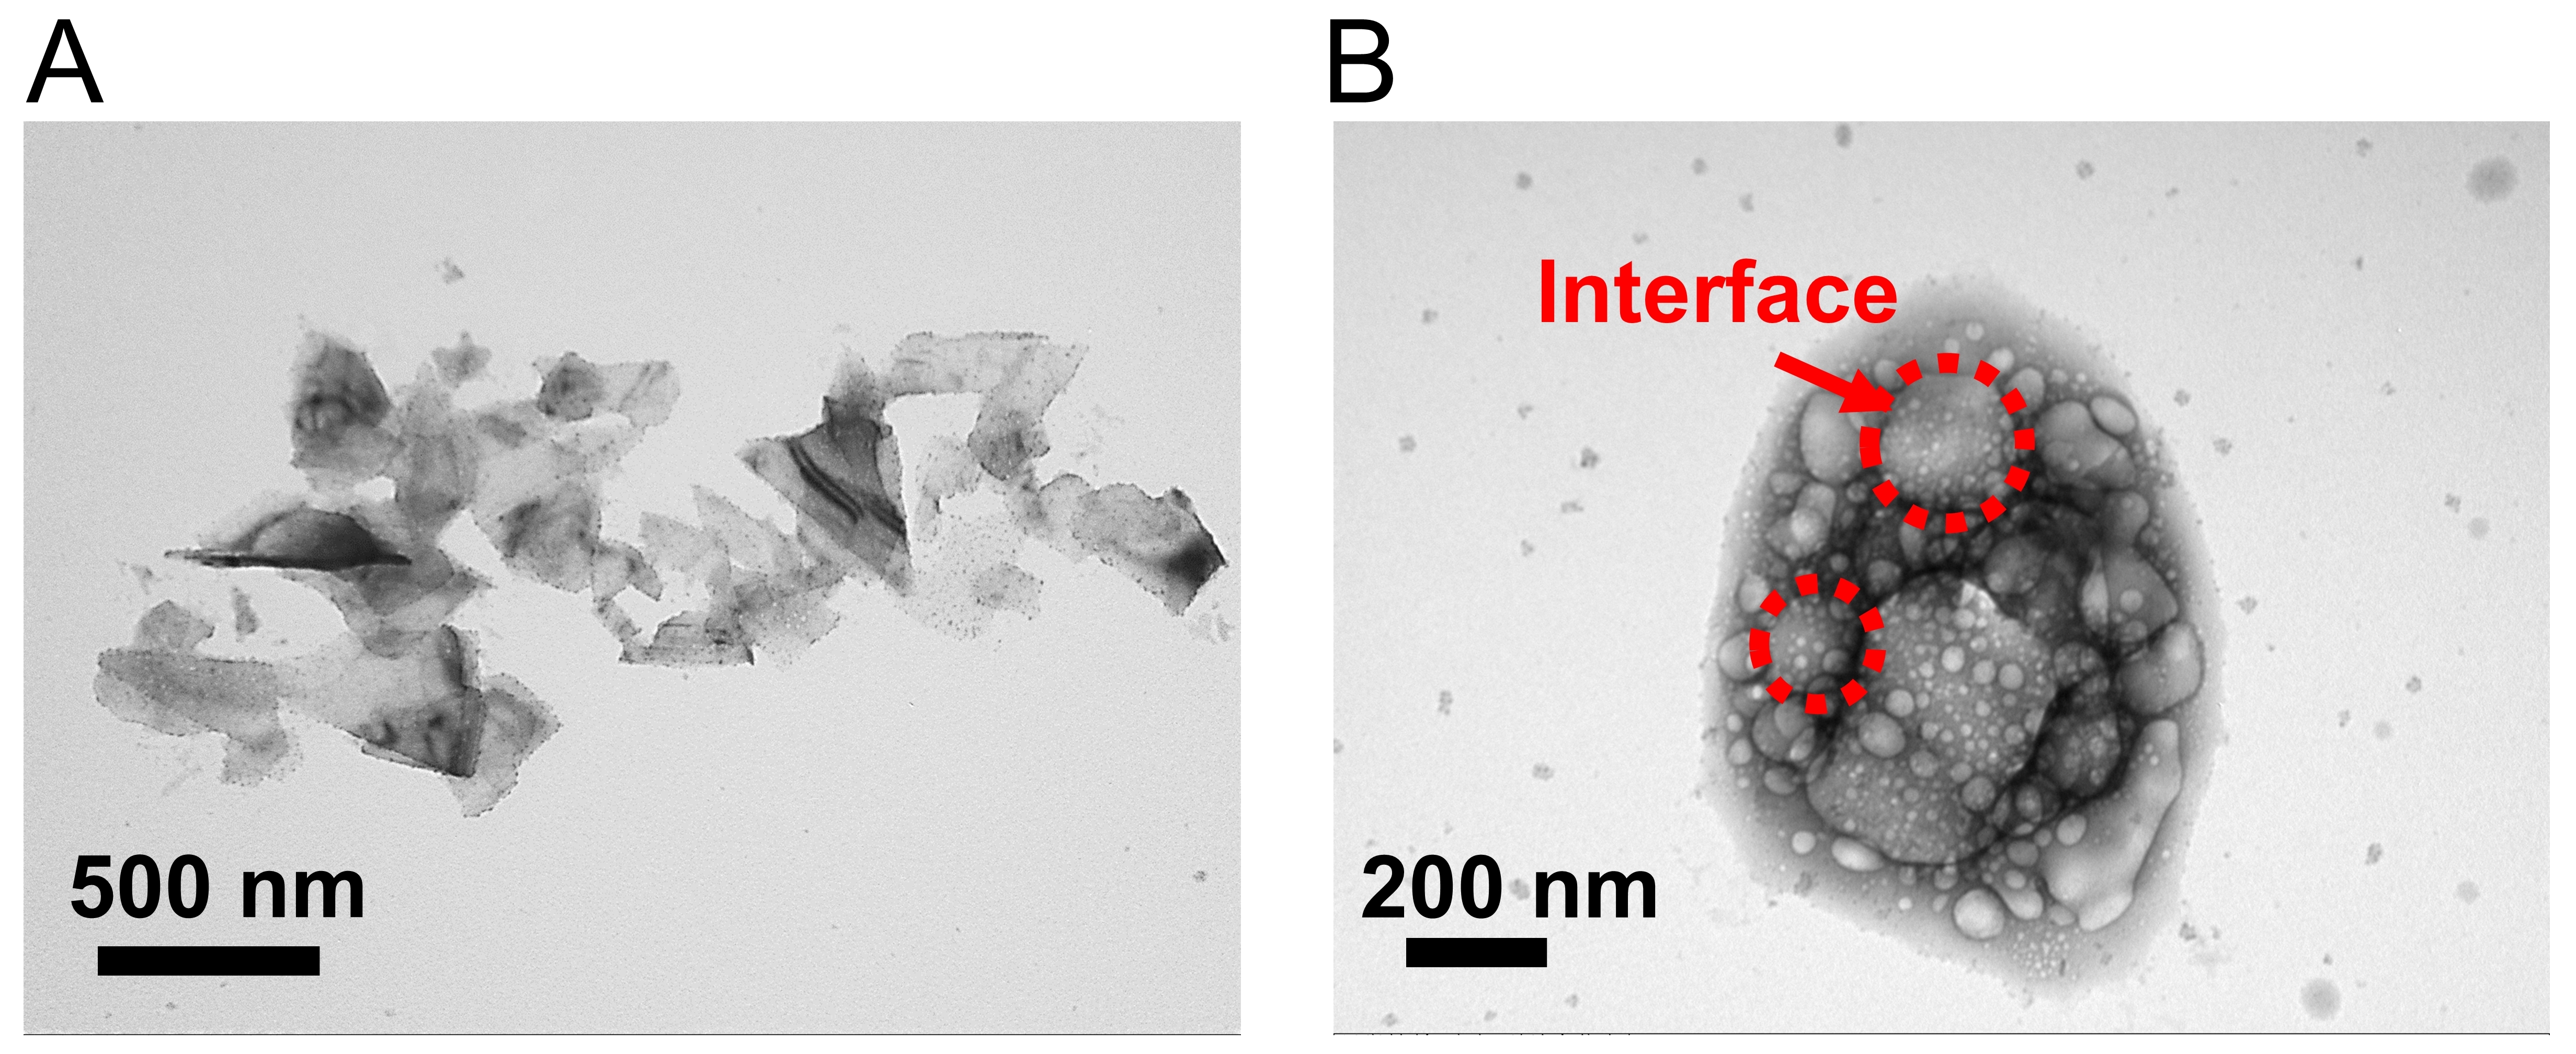


**Fig. S1** TEM image of exfoliated black phosphorus nanosheets (A) and oxidative TAM@BP-FA after five ultrasonic treatments for 48 h in the process of in vitro drug release.


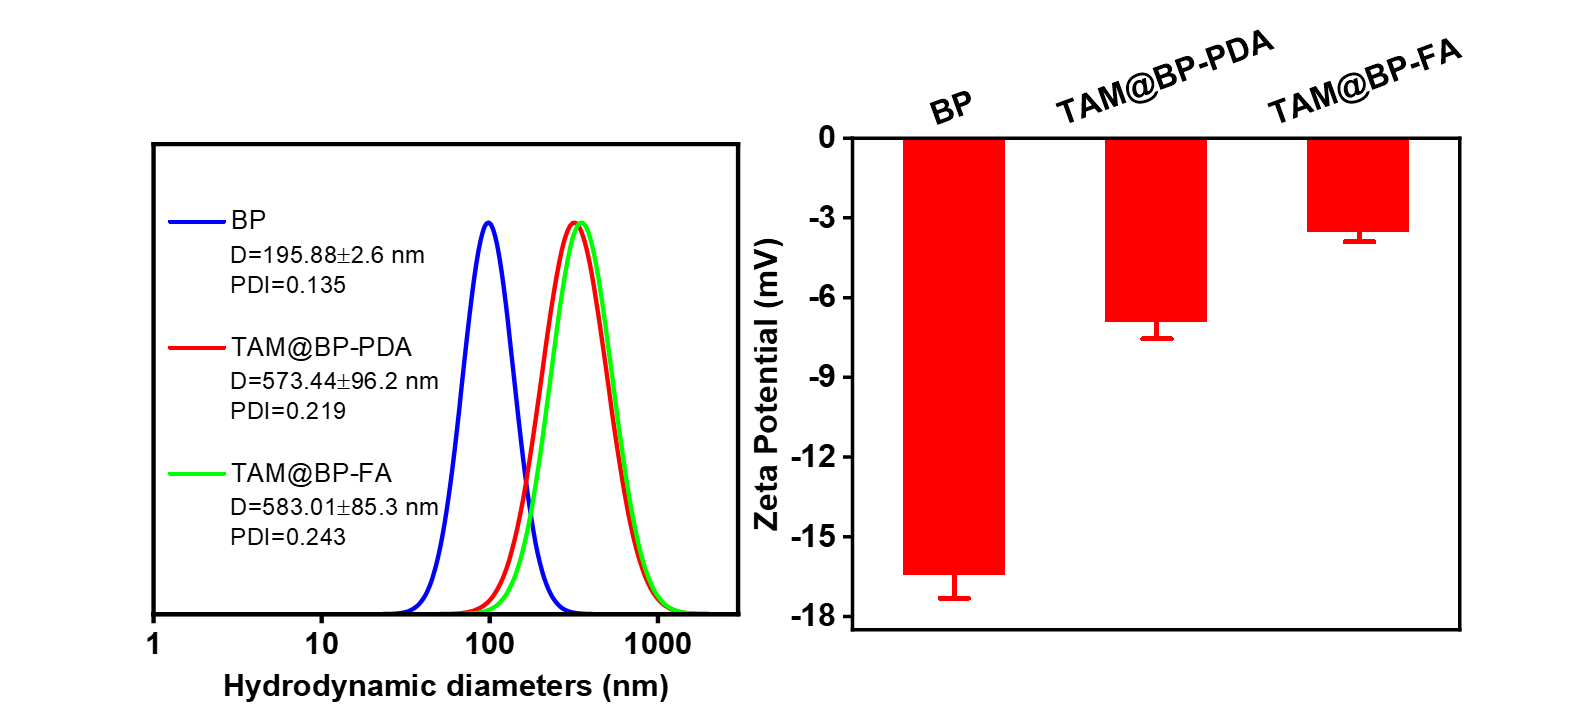


**Fig. S2** (A) Hydrodynamic diameter and (B) Zeta potential of black phosphorus nanosheets (BPS), TAM@BP-PDA and TAM@BP-FA.

**B**

**A**

**Fig. S3** (A) UV-vis spectrum of TAM with various concentrations. (B) The standard curve at 278nm with various concentrations.

**Fig. S4** Cell viability of MCF7 and TMR cells treated with increased dosage of free TAM.


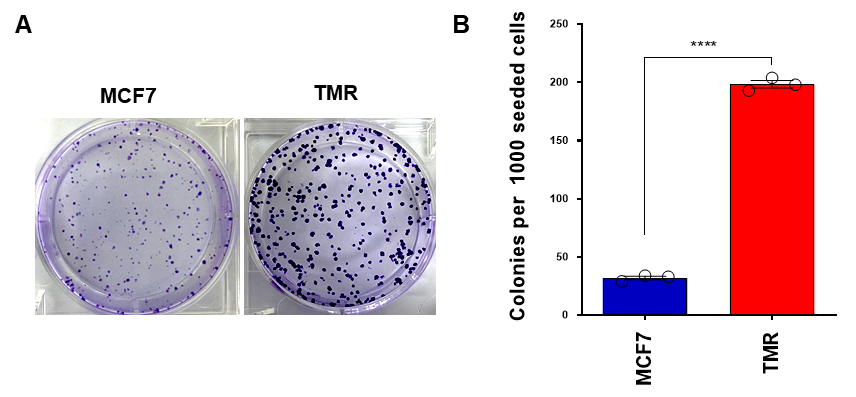


**Fig. S5** (A) Images of colony formation assays performed in MCF7 and TMR cells. (B) Quantification of colony number in Fig S2B. Data are means ± SD (n = 3).，****p < 0.0001.


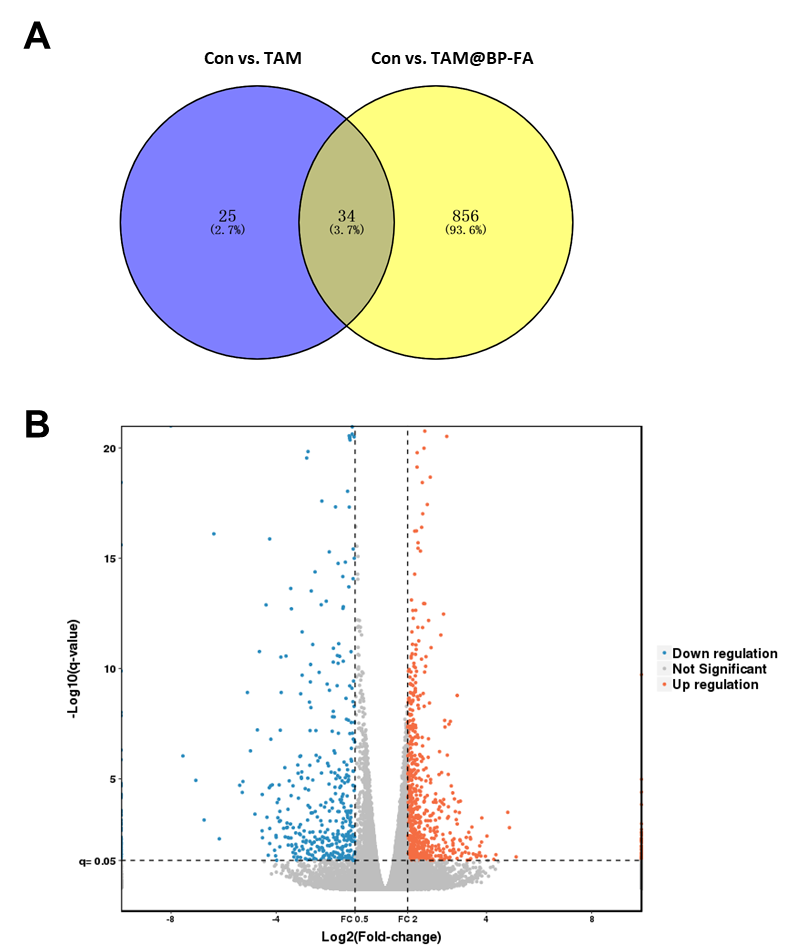


**Fig. S6** (A) Venn diagram for intergroup comparison (Con vs. TAM, Con vs. TAM@BP-FA) overlap of differentially expressed genes using an online tool. (B) Volcano plots for intergroup comparison (Con vs. TAM, Con vs. TAM@BP-FA) overlap of differentially expressed genes.

**Fig. S7** The gene expression of the CCND1, MYC and ESR in MCF7 cells treated with free TAM or TAM@BP-FA. NS no significance, *p < 0.05, **p < 0.01, and ****p < 0.0001.


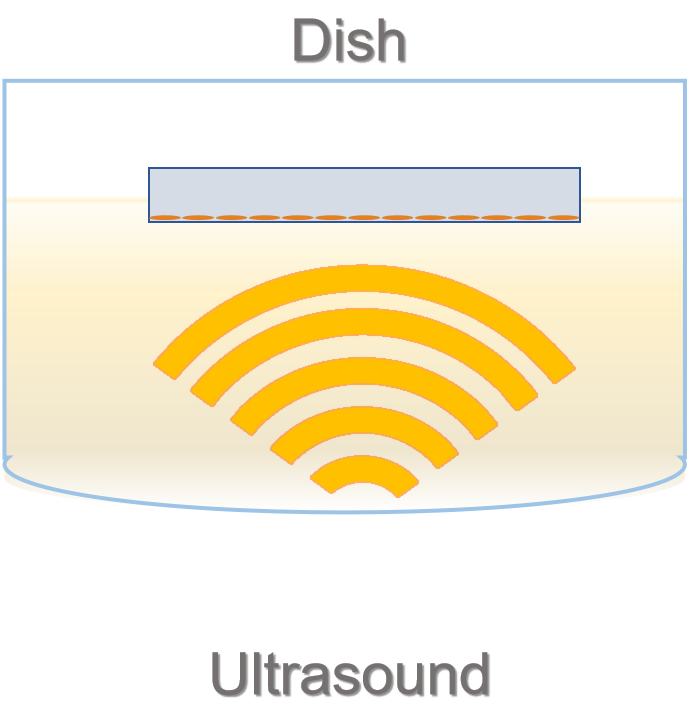


**Fig. S8** Schematic illustration of the SDT setting


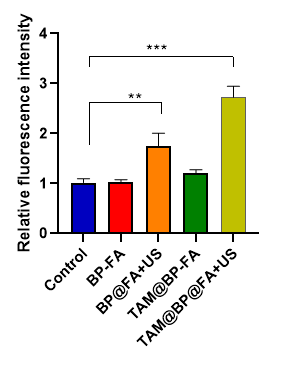


**Fig. S9** Relative fluorescence intensity of ROS detection in TMR cells following BP-FA, BP-FA and US, TAM@BP-FA and US treatments. **p < 0.01, ***p < 0.001 .


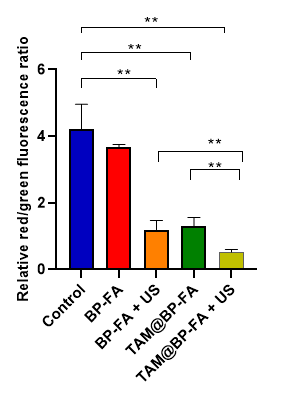


**Fig. S10** Relative red/green ratio of MMP detection in TMR cells following BP-FA, BP-FA and US, TAM@BP-FA and US treatments. **p < 0.01.


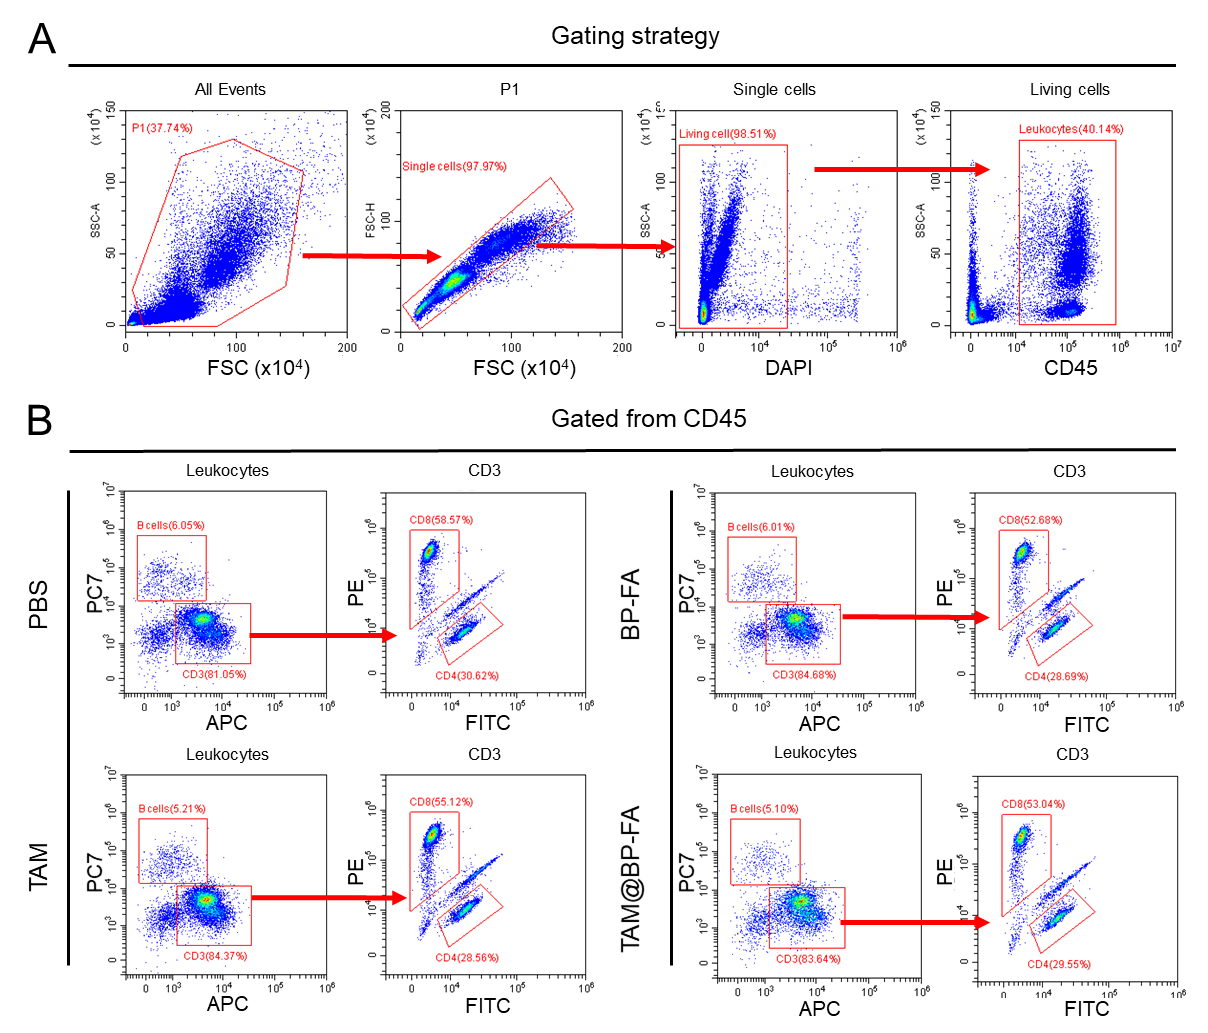


**Fig. S11** (A) Gating strategy. (B) Representation of B cells, CD4+, CD8+ cells distributions among the cohorts by FACS analysis.

**Fig. S12** Body weight in various groups during the treatment process. G1-G7 represent mice treated with PBS, TAM, BP+US, BP-FA+US, TAM@BP+US, TAM@BP-FA and TAM@BP-FA+US respectively.
